# Supplementary material
Source: PubMed Central journal article supplement (PMC6442354)
Supplement: ASN.2018080844SupplementaryData.pdf [file ASN.2018080844SupplementaryData.pdf]

## **SUPPLEMENTAL MATERIAL**

### **Supplemental Table of Contents**

Supplemental Figure S1

Supplemental Figure S2

**Supplemental Figure S1**

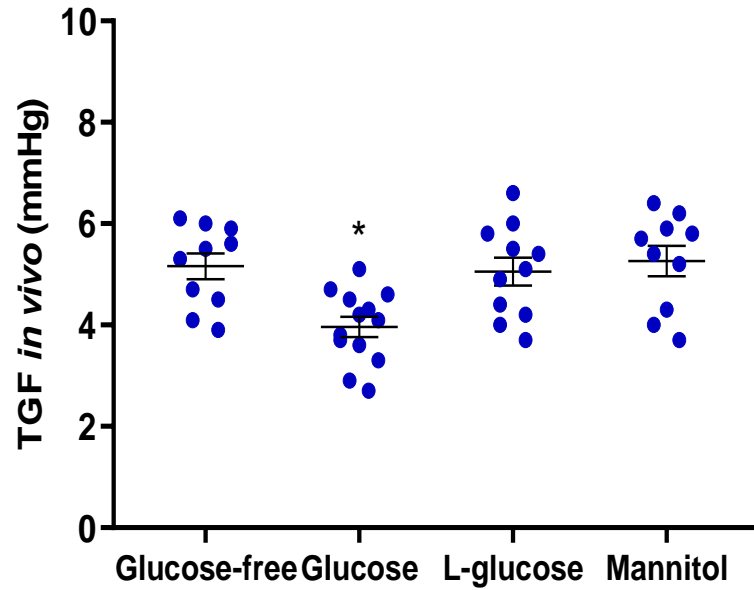

To avoid any systematic error introduced by consecutive measurements of  $\Delta P_{sf}$  in the same nephron, TGF response *in vivo* was also assessed directly under high glucose condition. The  $\Delta P_{sf}$  measured with ATF containing 16.7 mM glucose was significantly lower than the control measurements with glucose-free ATF, ATF containing 16.7 mM L-glucose or ATF containing 16.7 mM mannitol.  $n=3-5$  mice/10-13 tubules.  $*p<0.05$  vs glucose-free ATF. Statistical difference was calculated by one-way ANOVA.

## Supplemental Figure S2

A.

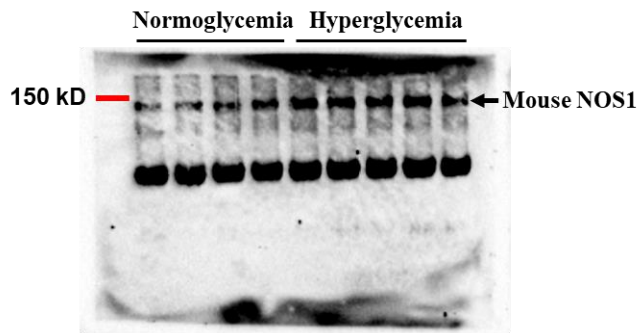

B.

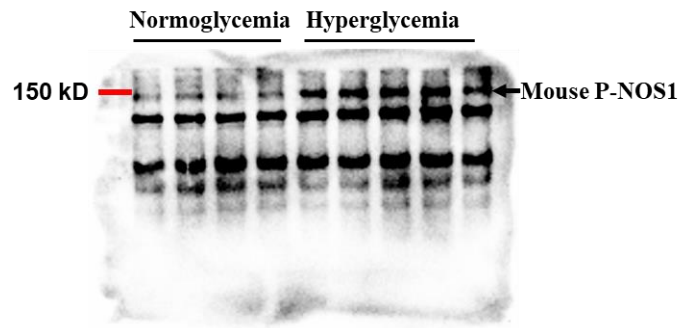

C.

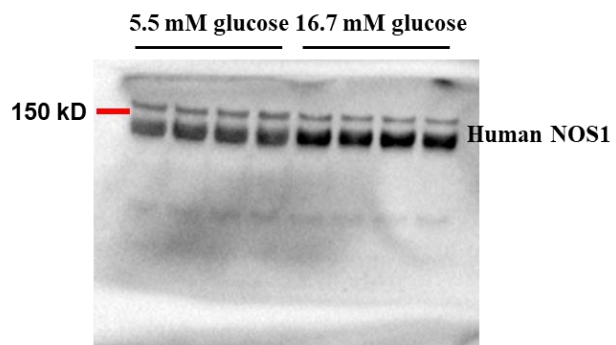

D.

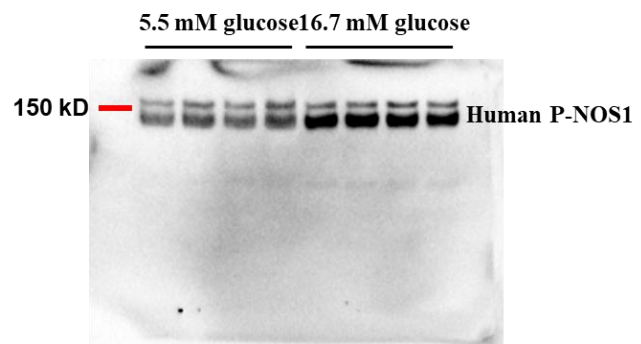

The complete gels for the Western blot of NOS1 and P-NOS1 in the mouse renal cortex (A and B) and human kidney biopsy (C and D).
